# Supplementary material
Source: MDPI journal article supplement (https://www.mdpi.com/2073-4395/13/7/1860)
Supplement: s1 [file s1]

**Supplementary Information for Publication**  
**Integrating Soil pH, Clay, and Neutralizing Value of Lime into a New Lime Requirement Model for Acidic Soils in China**

**Dandan Han <sup>1,2</sup>, Saiqi Zeng <sup>3</sup>, Xi Zhang <sup>1</sup>, Jumei Li <sup>1</sup>, and Yibing Ma <sup>4,\*</sup>**

<sup>1</sup> Institute of Agricultural Resources and Regional Planning, Chinese Academy of Agricultural Sciences, Beijing 100081, China; lijumei@caas.cn; sunnyx321@163.com

<sup>2</sup> College of Resources and Environmental Sciences, China Agricultural University, Beijing 100193, China; handandan159753@163.com

<sup>3</sup> Institute of Soil and Water Resources and Environmental Science, College of Environmental and Resource Sciences, Zhejiang University, Hangzhou, Zhejiang 310058, China; sqzeng@zju.edu.cn

<sup>4</sup> Macau Environmental Research Institute, Macau University of Science and Technology, Macau 999078, China; ybma@must.edu.mo

\* Correspondence: ybma@must.edu.mo; Fax: +853 28833280

Number of pages: 6

Number of tables: 7

**Contents**

**Table S1.** Descriptive statistics of soil and lime properties.

**Table S2:** Selected physical and chemical properties of acidic soil.

**Table S3:** Calcium, and magnesium in lime samples.

**Table S4:** The data used in model validation.

**Table S5.** Descriptive statistics of neutralizing value (mmol kg<sup>-1</sup>) of lime.

**Table S6:** The RMSE, MAPE, and ME between the actual LR and predicted LR.

**Table S7:** The RMSE, MAPE, and ME between the actual LR in field condition and predicted LR.

**Table S1.** Descriptive statistics of soil and lime properties.

| Properties               | Mean  | Standard deviation | Median | Minimum | Maximum |
|--------------------------|-------|--------------------|--------|---------|---------|
| Soil (n = 17)            |       |                    |        |         |         |
| pH (soil: water 1:5)     | 5.05  | 0.13               | 5.09   | 4.39    | 6.19    |
| OM (g kg <sup>-1</sup> ) | 20.51 | 2.28               | 19.44  | 5.10    | 37.07   |
| Clay (%)                 | 38.05 | 3.68               | 41.40  | 4.40    | 60.40   |
| Silt (%)                 | 22.94 | 2.16               | 23.00  | 5.60    | 38.00   |
| Sand (%)                 | 39.01 | 4.81               | 35.60  | 19.60   | 76.60   |
| Quicklime (n = 10)       |       |                    |        |         |         |
| [Ca+ Mg] (%)             | 64.14 | 1.56               | 63.03  | 58.93   | 72.07   |
| Hydrated lime (n = 10)   |       |                    |        |         |         |
| [Ca+ Mg] (%)             | 55.52 | 1.16               | 55.50  | 47.55   | 59.93   |
| Limestone (n = 10)       |       |                    |        |         |         |
| [Ca+ Mg] (%)             | 42.41 | 1.87               | 41.77  | 28.74   | 50.04   |
| Dolomite (n = 9)         |       |                    |        |         |         |
| [Ca+ Mg] (%)             | 38.19 | 2.47               | 37.70  | 29.14   | 53.19   |

[Ca+Mg] is the content of calcium plus magnesium in lime.

**Table S2.** Selected physical and chemical properties of acidic soil.

| Soil | Location                                   | pH   | OM<br>(g kg <sup>-1</sup> ) | Clay<br>(%) | Silt<br>(%) | Sand<br>(%) |
|------|--------------------------------------------|------|-----------------------------|-------------|-------------|-------------|
| S1   | Yongzhou, Hunan (26.77° N, 111.87° E)      | 4.48 | 30.79                       | 57.4        | 22.0        | 20.6        |
| S2   | Hainan (19.77° N, 109.57° E)               | 4.57 | 12.48                       | 42.4        | 29.0        | 28.6        |
| S3   | Guiyang, Guizhou (26.60° N, 106.73° E)     | 5.45 | 37.07                       | 43.4        | 32.0        | 24.6        |
| S4   | Guangzhou, Guangdong (21.45° N, 110.79° E) | 4.48 | 21.62                       | 60.4        | 19.0        | 20.6        |
| S5   | Guangzhou, Guangdong (23.17° N, 112.56° E) | 4.62 | 9.58                        | 25.8        | 5.6         | 68.6        |
| S6   | Yongzhou, Hunan (26.77° N, 111.88° E)      | 4.77 | 29.45                       | 44.4        | 31.0        | 24.6        |
| S7   | Shaoyang, Hunan (26.98° N, 111.97° E)      | 5.19 | 9.86                        | 13.4        | 10.0        | 76.6        |
| S8   | Danzhou, Hainan (19.77° N, 109.57° E)      | 4.61 | 26.72                       | 4.40        | 23.0        | 72.6        |
| S9   | Haikou, Hainan (19.99° N, 110.34° E)       | 6.19 | 19.44                       | 32.0        | 8.4         | 59.6        |
| S10  | Yingtian, Jiangxi (28.27° N, 117.08° E)    | 4.66 | 11.99                       | 43.4        | 20.0        | 36.6        |
| S11  | Yingtian, Jiangxi (28.27° N, 117.08° E)    | 6.06 | 14.22                       | 39.4        | 25.0        | 35.6        |
| S12  | Yinngtan, Jiangxi (28.27° N, 117.08° E)    | 5.10 | 16.05                       | 39.4        | 24.0        | 36.6        |
| S13  | Yueyang, Hunan (29.06° N, 113.00° E)       | 4.39 | 5.10                        | 45.4        | 32.0        | 22.6        |
| S14  | Yongzhou, Hunan (26.77° N, 111.88° E)      | 5.52 | 28.28                       | 25.4        | 20.0        | 54.6        |
| S15  | Yongzhou, Hunan (26.77° N, 111.88° E)      | 5.09 | 30.53                       | 29.4        | 30.0        | 40.6        |
| S16  | Guiyang, Guizhou (26.65° N, 106.80° E)     | 5.21 | 16.57                       | 41.4        | 38.0        | 20.6        |
| S17  | Guiyang, Guizhou (26.42° N, 106.68° E)     | 5.38 | 28.89                       | 59.4        | 21.0        | 19.6        |

**Table S3.** Calcium, and magnesium in lime samples.

| No. | Lime sample | Lime source   | Ca (%) | Mg (%) | Location            |
|-----|-------------|---------------|--------|--------|---------------------|
| 1   | Q1          | Quick lime    | 57.15  | 2.45   | Jinan, Shandong     |
| 2   | Q2          | Quick lime    | 61.46  | 0.76   | Anshun, Guizhou     |
| 3   | Q3          | Quick lime    | 57.12  | 2.77   | Yongan, Fujian      |
| 4   | Q4          | Quick lime    | 61.81  | 2.02   | Laizhou, Shandong   |
| 5   | Q5          | Quick lime    | 58.90  | 0.27   | Guilin, Guangxi     |
| 6   | Q6          | Quick lime    | 58.64  | 0.29   | Baise, Guangxi      |
| 7   | Q7          | Quick lime    | 67.59  | 4.48   | Dengfeng, Henan     |
| 8   | Q8          | Quick lime    | 64.32  | 2.68   | Dengfeng, Henan     |
| 9   | Q9          | Quick lime    | 66.01  | 3.62   | Linyi, Shandong     |
| 10  | Q10         | Quick lime    | 65.87  | 3.23   | Yantai, Shandong    |
| 11  | H1          | Hydrated lime | 54.97  | 2.34   | Jinan, Shandong     |
| 12  | H2          | Hydrated lime | 55.86  | 2.52   | Luoyang, Henan      |
| 13  | H3          | Hydrated lime | 47.31  | 0.24   | Longyan, Fujian     |
| 14  | H4          | Hydrated lime | 52.61  | 2.69   | Yantai, Shandong    |
| 15  | H5          | Hydrated lime | 59.44  | 0.49   | Jian, Jiangxi       |
| 16  | H6          | Hydrated lime | 54.66  | 0.23   | Shangrao, Jiangxi   |
| 17  | H7          | Hydrated lime | 59.31  | 0.21   | Guilin, Guangxi     |
| 18  | H8          | Hydrated lime | 54.82  | 0.87   | Laibin, Guangxi     |
| 19  | H9          | Hydrated lime | 53.45  | 0.52   | Qingyuan, Guangdong |
| 20  | H10         | Hydrated lime | 52.39  | 0.28   | Linyi, Shandong     |
| 21  | L1          | Limestone     | 40.77  | 0.70   | Yongan, Fujian      |
| 22  | L2          | Limestone     | 49.84  | 0.20   | Sanmenxia, Henan    |
| 23  | L3          | Limestone     | 39.95  | 1.02   | Nanping, Fujian     |
| 24  | L4          | Limestone     | 41.82  | 0.25   | Linyi, Shandong     |
| 25  | L5          | Limestone     | 43.93  | 2.03   | Dengfeng, Henan     |
| 26  | L6          | Limestone     | 28.36  | 0.38   | Laizhou, Shandong   |
| 27  | L7          | Limestone     | 48.30  | 0.33   | Shangrao, Jiangxi   |
| 28  | L8          | Limestone     | 45.16  | 0.18   | Nanning, Guangxi    |
| 29  | L9          | Limestone     | 40.08  | 0.39   | Linyi, Shandong     |
| 30  | L10         | Limestone     | 39.11  | 1.28   | Jinan, Shandong     |
| 31  | D1          | Dolomite      | 27.19  | 10.51  | Jinan, Shandong     |
| 32  | D2          | Dolomite      | 21.24  | 12.72  | Guizhou             |
| 33  | D3          | Dolomite      | 20.08  | 11.96  | Longyan, Fujian     |
| 34  | D4          | Dolomite      | 21.54  | 7.60   | Laizhou, Shandong   |
| 35  | D5          | Dolomite      | 44.77  | 0.16   | Nanning, Guangxi    |
| 36  | D6          | Dolomite      | 40.40  | 0.13   | Laibin, Guangxi     |
| 37  | D7          | Dolomite      | 35.41  | 17.78  | Jinan, Shandong     |
| 38  | D8          | Dolomite      | 22.07  | 11.13  | Dengfeng, Henan     |
| 39  | D9          | Dolomite      | 38.44  | 0.56   | Putian, Fujian      |

1 **Table S4.** The data used in model validation (The following five criteria were applied to select appropriate data: (1) the authors should use inorganic lime, including calcium oxide,  
2 calcium hydroxide, calcium carbonate, quicklime, hydrated lime, limestone, or dolomite, to increase soil pH; (2) the studies should be conducted in fields, and include no liming control  
3 and liming treatment; (3) the soil pH of each treatment should be clearly revealed in text, tables or could be obtained from figures; (4) the soil pH in treatment without liming should be  
4 less than 7.00, and the pH of soil which applied liming material should be less than 7.50; (5) the content of clay in soil and the main composition of liming material should be shown  
5 clearly in reports; (6) the NV of lime was calculated by  $NV = 0.27 \times [Ca + Mg] + 7.56$ , which derived in section 3.1).

| NO. | Location       | Crop    | Lime source   | Main component                      | [Ca+Mg]<br>(%) | Clay<br>(<0.002mm) % | Initial pH<br>(1:2.5) | Target pH<br>(1:2.5) | Application rate<br>(t ha <sup>-1</sup> ) | Reference |
|-----|----------------|---------|---------------|-------------------------------------|----------------|----------------------|-----------------------|----------------------|-------------------------------------------|-----------|
| 1   | Zhejiang       | Barley  | Limestone     | 53% CaO, 2.2% MgO                   | 38.22          | 39.10                | 5.60                  | 6.34                 | 1.88                                      | [64]      |
| 2   | Zhejiang       | Barley  | Limestone     | 53% CaO, 2.2% MgO                   | 38.22          | 39.10                | 5.60                  | 6.45                 | 3.75                                      | [64]      |
| 3   | Zhejiang       | Barley  | Limestone     | 53% CaO, 2.2% MgO                   | 38.22          | 39.10                | 5.60                  | 7.47                 | 7.50                                      | [64]      |
| 4   | Zhejiang       | Barley  | Hydrated lime | 95% Ca(OH) <sub>2</sub>             | 54.35          | 39.10                | 5.60                  | 5.62                 | 1.39                                      | [64]      |
| 5   | Zhejiang       | Barley  | Hydrated lime | 95% Ca(OH) <sub>2</sub>             | 54.35          | 39.10                | 5.60                  | 6.49                 | 2.78                                      | [64]      |
| 6   | Zhejiang       | Barley  | Hydrated lime | 95% Ca(OH) <sub>2</sub>             | 54.35          | 39.10                | 5.60                  | 7.25                 | 5.55                                      | [64]      |
| 7   | Zhejiang       | Barley  | Limestone     | 53% CaO, 2.2% MgO                   | 38.22          | 39.10                | 5.10                  | 7.44                 | 7.50                                      | [64]      |
| 8   | Zhejiang       | Barley  | Hydrated lime | 95% Ca(OH) <sub>2</sub>             | 54.35          | 39.10                | 5.10                  | 5.43                 | 1.39                                      | [64]      |
| 9   | Zhejiang       | Barley  | Hydrated lime | 95% Ca(OH) <sub>2</sub>             | 54.35          | 39.10                | 5.10                  | 7.32                 | 5.55                                      | [64]      |
| 10  | Fujian         | Pakchoi | Quicklime     | CaO                                 | 71.43          | 35.50                | 5.90                  | 6.93                 | 1.50                                      | [65]      |
| 11  | South of China | Tobacco | Quicklime     | CaO                                 | 71.43          | 25.00                | 6.69                  | 6.93                 | 0.83                                      | [66]      |
| 12  | South of China | Tobacco | Quicklime     | CaO                                 | 71.43          | 31.40                | 6.35                  | 6.86                 | 0.83                                      | [66]      |
| 13  | Zhejiang       | Soybean | Limestone     | CaCO <sub>3</sub>                   | 40.00          | 40.30                | 5.08                  | 6.43                 | 4.50                                      | [67]      |
| 14  | Fujian         | Tobacco | Dolomite      | CaMg(CO <sub>3</sub> ) <sub>2</sub> | 40.00          | 24.00                | 4.78                  | 5.32                 | 1.50                                      | [68]      |
| 15  | Hunan          | Rice    | Limestone     | CaCO <sub>3</sub>                   | 40.00          | 19.70                | 5.41                  | 6.20                 | 2.00                                      | [52]      |
| 16  | Hunan          | Rice    | Limestone     | CaCO <sub>3</sub>                   | 40.00          | 19.70                | 5.41                  | 6.40                 | 4.00                                      | [52]      |
| 17  | Hunan          | Rice    | Limestone     | 92% CaCO <sub>3</sub>               | 36.80          | 46.00                | 4.70                  | 5.28                 | 2.25                                      | [50]      |
| 18  | Hunan          | Rice    | Limestone     | 92% CaCO <sub>3</sub>               | 36.80          | 46.00                | 4.70                  | 6.00                 | 4.50                                      | [50]      |
| 19  | Hunan          | Rice    | Limestone     | 92% CaCO <sub>3</sub>               | 36.80          | 46.00                | 4.70                  | 6.40                 | 7.50                                      | [50]      |
| 20  | Hunan          | Rice    | Quicklime     | CaO                                 | 71.43          | 48.90                | 5.85                  | 6.12                 | 0.90                                      | [69]      |

| NO. | Location | Crop | Lime source   | Main component      | [Ca+Mg]<br>(%) | Clay<br>(<0.002mm) % | Initial pH<br>(1:2.5) | Target pH<br>(1:2.5) | Application rate<br>(t ha <sup>-1</sup> ) | Reference |
|-----|----------|------|---------------|---------------------|----------------|----------------------|-----------------------|----------------------|-------------------------------------------|-----------|
| 21  | Jiangxi  | Rice | Hydrated lime | Ca(OH) <sub>2</sub> | 54.40          | 12.70                | 4.50                  | 5.41                 | 2.25                                      | [51]      |
| 22  | Jiangxi  | Rice | Hydrated lime | Ca(OH) <sub>2</sub> | 54.40          | 12.70                | 4.50                  | 5.45                 | 2.25                                      | [51]      |
| 23  | Jiangxi  | Rice | Hydrated lime | Ca(OH) <sub>2</sub> | 54.40          | 18.52                | 5.35                  | 6.30                 | 2.23                                      | [70]      |
| 24  | Jiangsu  | Rice | Hydrated lime | Ca(OH) <sub>2</sub> | 54.40          | 21.52                | 6.05                  | 6.80                 | 2.23                                      | [70]      |

6

7 **Table S5.** Descriptive statistics of neutralizing value (mmol kg<sup>-1</sup>) of lime.

| Lime source   | Mean  | Standard deviation | Median | Minimum | Maximum | Relative value |
|---------------|-------|--------------------|--------|---------|---------|----------------|
| Quicklime     | 24.68 | 0.42               | 24.69  | 21.98   | 27.16   | 1.00           |
| Hydrated lime | 23.58 | 0.32               | 23.80  | 21.26   | 24.94   | 0.96           |
| Limestone     | 18.34 | 0.79               | 18.65  | 12.94   | 23.17   | 0.74           |
| Dolomite      | 18.20 | 0.58               | 18.79  | 15.49   | 19.71   | 0.74           |

8

9 **Table S6.** The RMSE, MAPE, and ME between the actual LR and predicted LR.

| LR<br>(t ha <sup>-1</sup> ) | RMSE         |              |               | MAPE         |              |               | ME           |              |               |
|-----------------------------|--------------|--------------|---------------|--------------|--------------|---------------|--------------|--------------|---------------|
|                             | Equation (8) | Equation (9) | Equation (10) | Equation (8) | Equation (9) | Equation (10) | Equation (8) | Equation (9) | Equation (10) |
| 0 < LR ≤ 3                  | 0.65         | 0.80         | 0.67          | 24.54        | 32.93        | 25.81         | 0.11         | - 0.03       | 0.16          |
| 3 < LR ≤ 6                  | 0.82         | 0.80         | 0.80          | 14.78        | 14.06        | 13.92         | 0.06         | 0.22         | 0.23          |
| 6 < LR ≤ 9                  | 0.99         | 0.92         | 0.94          | 10.64        | 9.78         | 9.97          | - 0.28       | - 0.40       | - 0.42        |
| 9 < LR ≤ 12                 | 1.40         | 1.58         | 1.61          | 12.16        | 14.32        | 14.55         | - 1.22       | - 1.21       | - 1.25        |
| 0 < LR ≤ 12                 | 0.82         | 0.87         | 0.83          | 18.01        | 21.11        | 18.11         | - 0.02       | - 0.06       | 0.01          |

10 RMSE is the root mean squared error, MAPE is the mean absolute percentage error, ME is the mean error

11

12 **Table S7.** The RMSE, MAPE, and ME between the actual LR in field condition and predicted LR.

| LR<br>(t ha <sup>-1</sup> ) | RMSE         |              |               | MAPE         |              |               | ME           |              |               |
|-----------------------------|--------------|--------------|---------------|--------------|--------------|---------------|--------------|--------------|---------------|
|                             | Equation (8) | Equation (9) | Equation (10) | Equation (8) | Equation (9) | Equation (10) | Equation (8) | Equation (9) | Equation (10) |
| 0 < LR ≤ 2                  | 0.93         | 0.78         | 0.78          | 65.73        | 45.11        | 45.41         | 0.75         | 0.63         | 0.63          |
| 2 < LR ≤ 4                  | 1.02         | 0.96         | 0.97          | 29.09        | 28.27        | 28.80         | 0.76         | 0.73         | 0.75          |
| 4 < LR ≤ 6                  | 0.27         | 0.03         | 0.04          | 9.79         | 2.82         | 3.15          | 0.48         | 0.14         | 0.16          |
| 6 < LR ≤ 8                  | 1.40         | 1.11         | 1.12          | 13.14        | 11.92        | 11.67         | 0.99         | 0.89         | 0.88          |
| 0 < LR ≤ 8                  | 0.98         | 0.83         | 0.84          | 37.62        | 28.30        | 28.61         | 0.74         | 0.62         | 0.62          |

13 RMSE is the root mean squared error, MAPE is the mean absolute percentage error, ME is the mean error
